# Supplementary material
Source: MDPI journal article supplement (https://www.mdpi.com/1999-4907/14/6/1226)
Supplement: s1 [file s1]

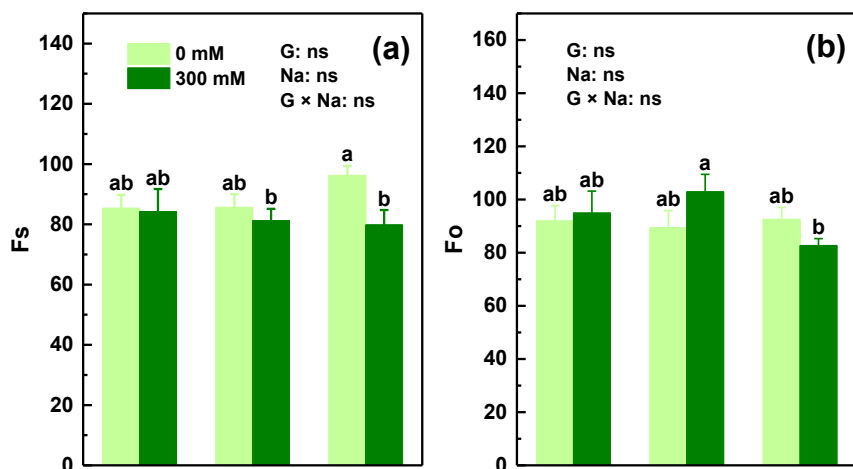

**Fig. S1** Fs (a) and Fo (b) of grafted *H. syriacus* leaves grown under either 0 (control) or 300 mM NaCl condition. Hs: self-rooted *H. syriacus*; Hs/Hs: self-grafted *H. syriacus*; Hs/Hh: heterografted *H. syriacus* with *H. hamabo* as rootstock. Bars indicate means  $\pm$  SE (n = 6). The information on treatments and statistical analysis is the same as mentioned in Fig. 1.
