# Supplementary material
Source: MDPI journal article supplement (https://www.mdpi.com/1999-4907/14/6/1226)
Supplement: s1 [file s1]

**Table S1** Primers used for RT-qPCR.

| Gene ID of<br>Hibiscus | Closest AGI | Gene description                                          | Primer-Forward (5')            | Primer-Reverse (3')            |
|------------------------|-------------|-----------------------------------------------------------|--------------------------------|--------------------------------|
| 120218252              | AT4G02770   | PSAD-1; photosystem I subunit D-1                         | 5'-AAGGTCCGAACCTGCTCAAG-3'     | 5'-ACACCATCTTTGGGGTGCAA-3'     |
| 120143282              | AT1G79040   | PSBR; photosystem II subunit R                            | 5'-AGAGTCGAGAGATCGGGTGT-3'     | 5'-CTTGATCTTCTTGCCGCCAC-3'     |
| 120187868              | AT2G30790   | PSBP-2; photosystem II subunit P-2                        | 5'-ATAACGGCCACCGTCAACAA-3'     | 5'-CCATTTCTTCTTCCAGAACTTGGT-3' |
| 120159644              | AT5G66570   | PSBO1; PS II oxygen-evolving complex 1                    | 5'-GCTAGGCTGACTTGCTGTTTG-3'    | 5'-GCTCCCGAGACAACAAGAGC-3'     |
| 120133157              | AT1G61520   | LHCA3; photosystem I light harvesting complex gene 3      | 5'-CTGCCCTCACTCAGCAACAA-3'     | 5'-TCTGCCTTGCAGTCTCAACT-3'     |
| 120131690              | AT2G34420   | LHB1B2; photosystem II light harvesting complex gene B1B2 | 5'-GACCCAGTTAACAACAATGC-3'     | 5'-CACGAAAATCACATCTTATTGA-3'   |
| 120138621              | AT2G40100   | LHCB4.3; light harvesting complex PSII                    | 5'-TGGGTACTCTTGGTGCAATC-3'     | 5'-CCCAAGATAAGAAGACCCCTTCC-3'  |
| 120127552              | AT4G21280   | PSBQ; photosystem II subunit Q                            | 5'-GACCTCGATTTGGCGTACAA-3'     | 5'-AGAATGTCCTTGGCTGATTCC-3'    |
| 120161339              | AT4G12800   | PSAL; photosystem I subunit L                             | 5'-CTCAAACCTTCCGGCATACA-3'     | 5'-CCTTAGAGGACCCGCTTTAAC-3'    |
| 120195698              | AT1G06680   | PSBP-1; photosystem II subunit P-1                        | 5'-GTGCATTACCACCATTACCATTAC-3' | 5'-GGCGATAACGAGGATGATCTAC-3'   |
| 120201701              | AT1G30380   | PSAK; photosystem I subunit K                             | 5'-CTGATTACCATTATTCGCCCTCT-3'  | 5'-TGGCTGGAGTTACAGAGATTTG-3'   |
| 120187249              | AT5G61410   | RPE; Ribulose-phosphate 3-epimerase                       | 5'-CCTGCCACCCCACTTACATC-3'     | 5'-CGATAAAGCTCTGCCCACCA-3'     |
| 120190004              | AT1G73110   | RCA-A; Rubisco activase-A                                 | 5'-TCTGGGGAGGGAAAGGTCAA-3'     | 5'-TGGTTCTCCAGCCCATTGAG-3'     |
| 120130928              | AT1G67090   | RBCS1A; ribulose biphosphate carboxylase small subunit 1A | 5'-CAACCATTGCCACTGTCAACC-3'    | 5'-CAGAGGAGGATTTGAGGCCG-3'     |
| 120147236              | AT2G39730   | RCA-B; Rubisco activase-B                                 | 5'-GAAAACCCCGTGTCCCAG-3'       | 5'-ATACGACCGTCACGGATGAG-3'     |
| 120200474              | AT1G32060   | PRK; Phosphoribulokinase                                  | 5'-AACACCATCGAAAACGCGCC-3'     | 5'-GCCAGACCAATCACAACCGT-3'     |
|                        |             | 18s rRNA <sup>a</sup>                                     | 5'-AACACGGACCAAGGAGTCTG-3'     | 5'-GCCTCCACCAGAGTTTCCTC-3'     |

a: From Lu et al (2022) A comparative analysis of photosynthetic function and reactive oxygen species metabolism responses in two hibiscus cultivars under saline conditions. *Plant Physiology and Biochemistry* **184**: 87-97.

**Table S2** The loadings of PCA (Figure 5a) of physiological parameters of of grafted *H. syriacus* leaves grown under either 0 (control) or 300 mM NaCl condition.

| Variables | PC1   | PC2   | PC3   | PC4   | PC5   | PC6   |
|-----------|-------|-------|-------|-------|-------|-------|
| Chl a     | 0.60  | 0.73  | 0.46  | 0.15  | 0.05  | 0.10  |
| Chl b     | 0.65  | 0.58  | 0.54  | 0.16  | -0.11 | -0.25 |
| Chl a+b   | 0.63  | 0.70  | 0.49  | 0.15  | 0.01  | 0.01  |
| Car       | 0.89  | 0.40  | 0.22  | 0.13  | 0.10  | 0.26  |
| Chla/b    | 0.68  | -0.14 | -0.48 | -0.09 | 0.32  | 0.53  |
| Fm        | -0.03 | 0.98  | -0.03 | 0.14  | -0.19 | 0.08  |
| Fo        | 0.96  | -0.23 | -0.11 | 0.15  | -0.25 | -0.11 |
| Fm'       | -0.48 | 0.73  | -0.51 | 0.09  | -0.25 | -0.13 |
| Fs        | 0.94  | 0.01  | -0.24 | 0.20  | -0.32 | -0.16 |
| Fv/Fm     | 0.80  | 0.66  | -0.06 | 0.03  | 0.09  | 0.11  |
| ΦPSII     | 0.37  | 0.85  | -0.44 | -0.18 | 0.18  | -0.09 |
| NPQ       | 0.82  | 0.00  | 0.51  | 0.04  | 0.10  | 0.22  |
| qP        | 0.95  | -0.02 | -0.36 | -0.16 | 0.08  | -0.16 |
| ETR       | 0.37  | 0.85  | -0.44 | -0.18 | 0.18  | -0.09 |
| Pn        | -0.87 | 0.49  | 0.12  | -0.15 | 0.03  | 0.09  |
| Ci        | 0.89  | -0.30 | -0.22 | 0.29  | 0.28  | -0.07 |
| WUEi      | 0.27  | 0.53  | 0.05  | -0.70 | -0.41 | 0.24  |
| E         | -0.87 | 0.23  | 0.07  | 0.37  | 0.32  | 0.07  |
| Gs        | -1.02 | 0.14  | -0.04 | 0.14  | 0.14  | 0.12  |
| E/Gs      | 1.05  | -0.13 | -0.02 | 0.12  | 0.00  | -0.09 |
| ETR/Pn    | 0.99  | -0.30 | -0.17 | -0.01 | -0.05 | -0.11 |
| Pnmax     | -0.47 | 0.42  | 0.27  | -0.35 | 0.47  | -0.43 |
| LSP       | 0.39  | -0.65 | 0.50  | -0.44 | 0.02  | -0.03 |
| LCP       | 0.93  | -0.28 | 0.02  | -0.09 | 0.09  | 0.02  |
| AQY       | 0.31  | 0.41  | 0.31  | 0.67  | 0.49  | -0.12 |
| Rd        | 0.76  | -0.04 | -0.02 | -0.21 | 0.34  | -0.13 |
